# Supplementary material for: How provenance and cultivation method shape morphological and physiological traits in the nickel hyperaccumulator Odontarrhena chalcidica
Source: Springer Nature journal article supplement (doi:10.1007/s11104-025-07911-8), 2025-09-25
Supplement: MOESM1 [file 11104_2025_7911_MOESM1_ESM.pdf]

1 **How provenance and cultivation method shape morphological and physiological traits in the nickel**  
2 **hyperaccumulator *Odontarrhena chalcidica***

3

4 **Authors**

5 Benedetta Montanarini<sup>1,&</sup>, Mirko Salinitro<sup>2,&</sup>, Maria Roberta Randi<sup>3</sup>, Davide Cavalletti<sup>1</sup>, Stefania Monari<sup>1</sup>, Guillaume  
6 Echevarria<sup>4</sup> and Annalisa Tassoni<sup>1</sup>

7 **Affiliations**

8 <sup>1</sup>Department of Biological Geological and Environmental Sciences, University of Bologna, Via Irnerio n.42, 40126  
9 Bologna, Italy.

10 <sup>2</sup>Laboratory of Plant Genetics, University of Wageningen, Droevendaalsesteeg n. 2, 6708 Pb Wageningen, Netherlands.

11 <sup>3</sup>Department of Biological Geological and Environmental Sciences, University of Bologna, Via Selmi n.3, 40126  
12 Bologna, Italy

13 <sup>4</sup>Botanickel, Econick, 14 Rue De Sarrebourg 54300, Luneville, France.

14 <sup>&</sup>Authors equally contributed to the paper

15

16 **Corresponding Author:** Annalisa Tassoni

17 Email: [annalisa.tassoni2@unibo.it](mailto:annalisa.tassoni2@unibo.it)

18

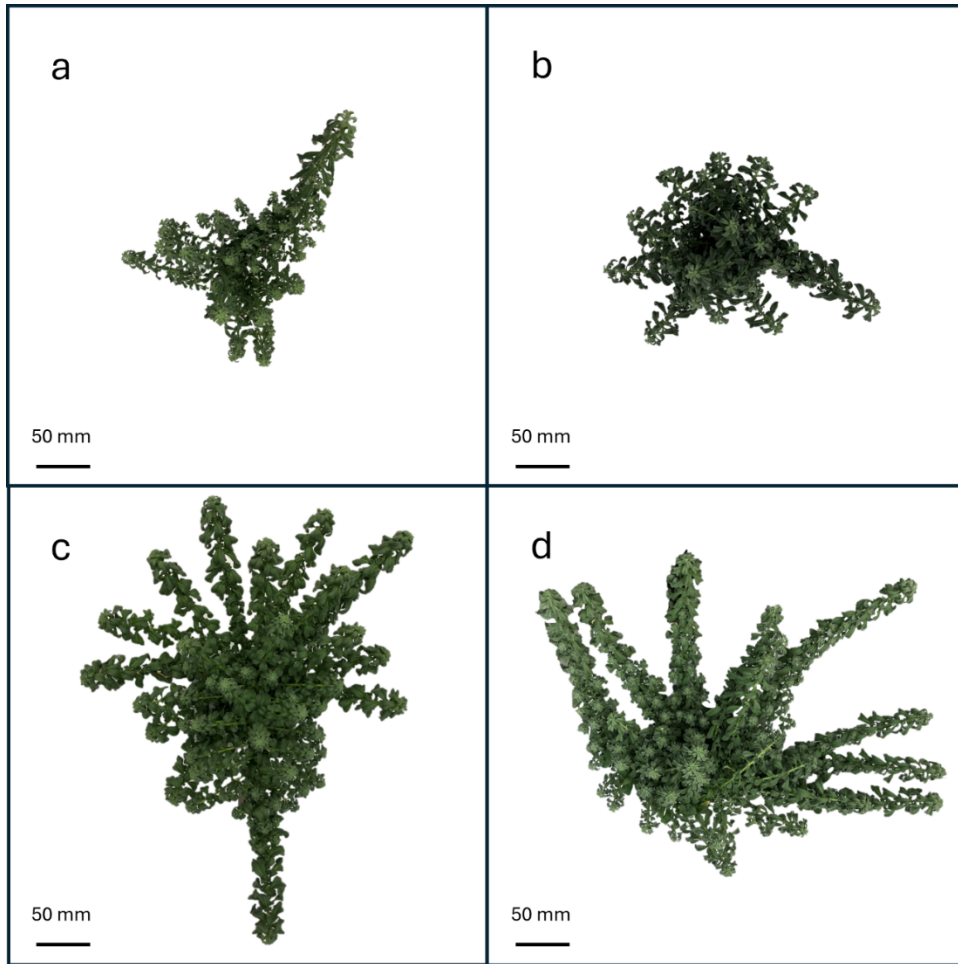

22  
23  
24 **Supplementary Fig. S1.** Plant architecture of the four genotypes of *Odontarrhena chalcidica*. EX (a); AO (b); KT (c);  
25 GR (d). The plant photos are representative for each genotype and were taken from a top-down perspective by B.  
26 Montanarini during hydroponic cultivation.

27  
28  
29

30 **TABLES**

31

32 **Table S1.** Nickel content in aeroponic and hydroponic nutrient solution and bioavailable nickel (DTPA-extractable) in  
 33 pot soil along the cultivation period.

| System (Timepoint)                 | Total nickel content (mg L <sup>-1</sup> ) |
|------------------------------------|--------------------------------------------|
| Nutrient solution (day 10)         | 1.52 ± 0.49                                |
| Nutrient solution (day 24)         | 1.95 ± 0.02                                |
| Nutrient solution (day 38)         | 1.09 ± 0.14                                |
| Nutrient solution (day 52)         | 1.12 ± 0.05                                |
| Soil – DTPA-extractable Ni (day 0) | 5.90 ± 0.96                                |

34 Hydroponic and aeroponic systems shared a common nutrient solution tank and recirculation system. Data represent the  
 35 average of the number of replicates ± SD. The number of replicates was for the nutrient solution (aeroponic and  
 36 hydroponic) equal to three, while it was five for the soil. DTPA, diethylenetriaminepentaacetic acid.

37

38

39 **Table S2.** Specific Leaf Area (mm<sup>2</sup> mg DW<sup>-1</sup>) of plants of the four genotypes of *Odontarrhena chalcidica* in aeroponic,  
 40 hydroponic and pot cultivation regimes at the end of the cultivation period (day 52).

| Genotype | Aeroponic                  | Hydroponic                  | Pot                        |
|----------|----------------------------|-----------------------------|----------------------------|
| EX       | 12.14 ± 0.32 <sup>Ax</sup> | 11.39 ± 0.92 <sup>Ax</sup>  | 10.73 ± 2.31 <sup>Ax</sup> |
| AO       | 12.02 ± 2.01 <sup>Ax</sup> | 11.35 ± 0.52 <sup>Ax</sup>  | 8.68 ± 0.50 <sup>Bx</sup>  |
| KT       | 11.52 ± 2.96 <sup>Ax</sup> | 14.44 ± 0.81 <sup>Axy</sup> | 11.57 ± 3.15 <sup>Ax</sup> |
| GR       | 11.37 ± 2.38 <sup>Ax</sup> | 12.92 ± 2.61 <sup>Ax</sup>  | 13.37 ± 5.36 <sup>Ax</sup> |

41 Upper case letters and lowercase letters indicate statistically significant differences among cultivation systems within the  
 42 same genotype and among different genotypes in the same cultivation system and were evaluated by the  
 43 ANOVA/Kruskal-Wallis tests followed by Tukey HSD/Dunn's tests ( $p < 0.05$ ). Data are given as mean (n=4) ± SD.

44

45 **Table S3.** Stomata density on leaves of the four genotypes of *Odontarrhena chalcidica* in aeroponic, hydroponic and pot cultivation regimes measured by Environmental Scanning  
 46 Electron Microscopy (ESEM) at the end of the cultivation period (day 52).

| Genotype | Abaxial leaf surface (number mm <sup>-2</sup> ) |                               |                               | Adaxial leaf surface (number mm <sup>-2</sup> ) |                              |                              |
|----------|-------------------------------------------------|-------------------------------|-------------------------------|-------------------------------------------------|------------------------------|------------------------------|
|          | Aeroponic                                       | Hydroponic                    | Pot                           | Aeroponic                                       | Hydroponic                   | Pot                          |
| EX       | 288.51 ± 64.36 <sup>Ax</sup>                    | 301.14 ± 42.31 <sup>Ax</sup>  | 299.87 ± 145.86 <sup>Ax</sup> | 91.54 ± 31.24 <sup>Ax</sup>                     | 95.01 ± 22.81 <sup>Ax</sup>  | 116.48 ± 52.16 <sup>Ax</sup> |
| AO       | 339.65 ± 41.51 <sup>Ax</sup>                    | 257.58 ± 29.47 <sup>Ax</sup>  | 186.87 ± 83.52 <sup>ABx</sup> | 67.87 ± 21.44 <sup>Ax</sup>                     | 100.06 ± 17.93 <sup>Ax</sup> | 84.60 ± 30.62 <sup>Ax</sup>  |
| KT       | 382.42 ± 65.51 <sup>Ax</sup>                    | 406.57 ± 33.71 <sup>Axy</sup> | 472.22 ± 76.02 <sup>Axy</sup> | 146.94 ± 26.37 <sup>Axy</sup>                   | 166.35 ± 20.16 <sup>Ay</sup> | 167.30 ± 20.89 <sup>Ax</sup> |
| GR       | 381.31 ± 46.92 <sup>Ax</sup>                    | 428.98 ± 49.46 <sup>Axy</sup> | 350.38 ± 93.89 <sup>Ax</sup>  | 129.42 ± 52.17 <sup>Ax</sup>                    | 165.40 ± 42.07 <sup>Ay</sup> | 150.25 ± 15.97 <sup>Ax</sup> |

47 Upper case letters and lowercase letters indicate statistically significant differences among cultivation systems within the same genotype and among different genotypes in the same  
 48 cultivation system and were evaluated by the ANOVA/Kruskal-Wallis tests followed by Tukey HSD/Dunn's tests ( $p < 0.05$ ). Data are given as mean (n=4) ± SD.

49

50

51

52

53 **Table S4.** Trichomes density on leaves of the four genotypes of *Odontarrhena chalcidica* in aeroponic, hydroponic and pot cultivation regimes measured by Environmental  
 54 Scanning Electron Microscopy (ESEM) at the end of the cultivation period (day 52).

| Genotype | Abaxial leaf surface (number mm <sup>-2</sup> ) |                             |                             | Adaxial leaf surface (number mm <sup>-2</sup> ) |                            |                             |
|----------|-------------------------------------------------|-----------------------------|-----------------------------|-------------------------------------------------|----------------------------|-----------------------------|
|          | Aeroponic                                       | Hydroponic                  | Pot                         | Aeroponic                                       | Hydroponic                 | Pot                         |
| EX       | 52.00 ± 13.45 <sup>Ax</sup>                     | 48.22 ± 5.79 <sup>Ax</sup>  | 48.13 ± 5.16 <sup>Ax</sup>  | 16.75 ± 10.48 <sup>Ax</sup>                     | 9.45 ± 0.93 <sup>Ax</sup>  | 10.24 ± 4.44 <sup>Ax</sup>  |
| AO       | 68.39 ± 3.32 <sup>Ax</sup>                      | 61.93 ± 1.37 <sup>Ay</sup>  | 55.20 ± 8.79 <sup>ABx</sup> | 17.01 ± 2.46 <sup>Ax</sup>                      | 19.52 ± 1.55 <sup>Ay</sup> | 21.91 ± 6.98 <sup>Ay</sup>  |
| KT       | 57.75 ± 12.39 <sup>Ax</sup>                     | 46.81 ± 5.16 <sup>Ax</sup>  | 62.41 ± 11.55 <sup>Ax</sup> | 6.15 ± 0.92 <sup>Axy</sup>                      | 4.53 ± 0.33 <sup>Az</sup>  | 7.52 ± 1.97 <sup>ABx</sup>  |
| GR       | 51.95 ± 4.37 <sup>Ax</sup>                      | 53.80 ± 3.76 <sup>Axy</sup> | 55.03 ± 7.59 <sup>Ax</sup>  | 12.57 ± 2.23 <sup>Ax</sup>                      | 10.46 ± 2.10 <sup>Ax</sup> | 13.01 ± 2.60 <sup>Axy</sup> |

55 Upper case letters and lowercase letters indicate statistically significant differences among cultivation systems within the same genotype and among different genotypes in the same  
 56 cultivation system and were evaluated by the ANOVA/Kruskal-Wallis tests followed by Tukey HSD/Dunn's tests ( $p < 0.05$ ). Data are given as mean (n=4) ± SD.

57

58 **Table S5.** Photosynthetic parameters of the four genotypes of *Odontarrhena chalcidica* in aeroponic, hydroponic and pot cultivation regimes measured by LI-COR infrared gas  
59 analyzer on three mature leaves per individual at day 52.

| Genotype | GasEx E (mol H <sub>2</sub> O m <sup>-2</sup> s <sup>-1</sup> ) |                             |                             | GasEx A (μmol CO <sub>2</sub> m <sup>-2</sup> s <sup>-1</sup> ) |                              |                              | GasEx gsw (mol H <sub>2</sub> O m <sup>-2</sup> s <sup>-1</sup> ) |                             |                             |
|----------|-----------------------------------------------------------------|-----------------------------|-----------------------------|-----------------------------------------------------------------|------------------------------|------------------------------|-------------------------------------------------------------------|-----------------------------|-----------------------------|
|          | Aeroponic                                                       | Hydroponic                  | Pot                         | Aeroponic                                                       | Hydroponic                   | Pot                          | Aeroponic                                                         | Hydroponic                  | Pot                         |
| EX       | 0.014 ± 0.001 <sup>Ax</sup>                                     | 0.011 ± 0.002 <sup>Bx</sup> | 0.009 ± 0.002 <sup>Bx</sup> | 23.059 ± 0.967 <sup>Ax</sup>                                    | 24.434 ± 3.330 <sup>Bx</sup> | 17.711 ± 7.325 <sup>Ax</sup> | 0.915 ± 0.078 <sup>Ax</sup>                                       | 0.676 ± 0.119 <sup>Ax</sup> | 0.563 ± 0.063 <sup>Ax</sup> |
| AO       | 0.011 ± 0.001 <sup>Ay</sup>                                     | 0.011 ± 0.001 <sup>Ax</sup> | 0.013 ± 0.003 <sup>Ax</sup> | 19.974 ± 3.100 <sup>Ax</sup>                                    | 20.520 ± 3.907 <sup>Ax</sup> | 26.994 ± 3.713 <sup>Ax</sup> | 0.582 ± 0.085 <sup>Ax</sup>                                       | 0.700 ± 0.095 <sup>Ax</sup> | 0.850 ± 0.179 <sup>Ax</sup> |
| KT       | 0.010 ± 0.001 <sup>Ay</sup>                                     | 0.010 ± 0.001 <sup>Ax</sup> | 0.011 ± 0.002 <sup>Ax</sup> | 21.399 ± 1.423 <sup>Ax</sup>                                    | 19.597 ± 1.591 <sup>Ax</sup> | 22.345 ± 3.636 <sup>Ax</sup> | 0.670 ± 0.025 <sup>Ax</sup>                                       | 0.685 ± 0.079 <sup>Ax</sup> | 0.736 ± 0.158 <sup>Ax</sup> |
| GR       | 0.013 ± 0.003 <sup>Ay</sup>                                     | 0.011 ± 0.001 <sup>Ax</sup> | 0.008 ± 0.003 <sup>Ax</sup> | 22.949 ± 0.700 <sup>Ax</sup>                                    | 22.873 ± 0.774 <sup>Ax</sup> | 18.404 ± 3.010 <sup>Ax</sup> | 0.903 ± 0.220 <sup>Ax</sup>                                       | 0.637 ± 0.112 <sup>Ax</sup> | 0.480 ± 0.160 <sup>Ax</sup> |

60 GasEx E, transpiration rate; GasEx A, assimilation rate; GasEx gsw, stomatal conductance. Upper case letters and lowercase letters indicate statistically significant differences  
61 among cultivation systems within the same genotype and among different genotypes in the same cultivation system and were evaluated by the ANOVA/Kruskal-Wallis tests  
62 followed by Tukey HSD/Dunn's tests ( $p < 0.05$ ). Data are given as mean (n=4) ± SD.

63  
64  
65  
66  
67 **Table S6.** Content of photosynthetic pigments in leaves of the four genotypes of *Odontarrhena chalcidica* in aeroponic, hydroponic and pot cultivation regimes measured with a  
68 spectrophotometer (day 52).

| Genotype | Chlorophyll a (mg g FW <sup>-1</sup> ) |                             |                             | Chlorophyll b (mg g FW <sup>-1</sup> ) |                             |                            | Carotenoids (mg g FW <sup>-1</sup> ) |                            |                            |
|----------|----------------------------------------|-----------------------------|-----------------------------|----------------------------------------|-----------------------------|----------------------------|--------------------------------------|----------------------------|----------------------------|
|          | Aeroponic                              | Hydroponic                  | Pot                         | Aeroponic                              | Hydroponic                  | Pot                        | Aeroponic                            | Hydroponic                 | Pot                        |
| EX       | 37.13 ± 1.37 <sup>Ay</sup>             | 15.43 ± 3.08 <sup>By</sup>  | 24.85 ± 0.62 <sup>Cx</sup>  | 11.99 ± 0.66 <sup>Ay</sup>             | 7.60 ± 0.84 <sup>By</sup>   | 8.54 ± 0.41 <sup>ABx</sup> | 9.36 ± 0.42 <sup>Ax</sup>            | 3.29 ± 0.80 <sup>Bx</sup>  | 6.47 ± 0.10 <sup>ABx</sup> |
| AO       | 29.80 ± 2.41 <sup>Ax</sup>             | 37.44 ± 5.43 <sup>Ax</sup>  | 25.49 ± 6.09 <sup>ABx</sup> | 9.88 ± 1.01 <sup>Ax</sup>              | 12.54 ± 1.97 <sup>Ax</sup>  | 7.85 ± 1.81 <sup>ABx</sup> | 8.16 ± 0.82 <sup>Ax</sup>            | 10.86 ± 1.62 <sup>Ay</sup> | 6.95 ± 1.77 <sup>ABx</sup> |
| KT       | 27.83 ± 2.83 <sup>Ax</sup>             | 31.85 ± 2.18 <sup>Axy</sup> | 26.62 ± 1.30 <sup>ABx</sup> | 8.28 ± 0.66 <sup>Ax</sup>              | 8.65 ± 0.29 <sup>Axy</sup>  | 7.97 ± 0.38 <sup>Ax</sup>  | 7.95 ± 1.14 <sup>Ax</sup>            | 10.44 ± 1.07 <sup>By</sup> | 7.83 ± 0.26 <sup>Ax</sup>  |
| GR       | 34.17 ± 3.53 <sup>Axy</sup>            | 30.92 ± 2.42 <sup>Axy</sup> | 28.39 ± 4.07 <sup>Ax</sup>  | 11.37 ± 1.30 <sup>Axy</sup>            | 10.44 ± 0.81 <sup>Axy</sup> | 9.67 ± 1.20 <sup>Ax</sup>  | 10.13 ± 1.05 <sup>Ax</sup>           | 9.60 ± 0.67 <sup>Ay</sup>  | 8.69 ± 1.30 <sup>Ax</sup>  |

69 Upper case letters and lowercase letters indicate statistically significant differences among cultivation systems within the same genotype and among different genotypes in the same  
70 cultivation system and were evaluated by the ANOVA/Kruskal-Wallis tests followed by Tukey HSD/Dunn's tests ( $p < 0.05$ ). Data are given as mean (n=4) ± SD.

71

72 **Table S7.** Nickel Translocation Factor (TF, shoot metal concentration/root metal concentration) of plants of the four genotypes of *Odontarrhena chalcidica* in  
 73 aeroponic, hydroponic and pot cultivation regimes (day 52).

| <b>Genotype</b> | <b>Aeroponic</b>          | <b>Hydroponic</b>         | <b>Pot</b>                  |
|-----------------|---------------------------|---------------------------|-----------------------------|
| EX              | 5.71 ± 2.20 <sup>Ax</sup> | 6.51 ± 0.94 <sup>Ax</sup> | 6.31 ± 2.44 <sup>Ax</sup>   |
| AO              | 6.93 ± 1.14 <sup>Ax</sup> | 7.52 ± 2.01 <sup>Ax</sup> | 11.38 ± 5.76 <sup>Ax</sup>  |
| KT              | 3.15 ± 0.99 <sup>Ax</sup> | 3.96 ± 0.56 <sup>Ax</sup> | 6.88 ± 2.07 <sup>Bx</sup>   |
| GR              | 6.71 ± 2.52 <sup>Ax</sup> | 7.53 ± 0.82 <sup>Ay</sup> | 16.69 ± 2.01 <sup>Bxy</sup> |

74 Upper case letters and lowercase letters indicate statistically significant differences among cultivation systems within the same genotype and among different  
 75 genotypes in the same cultivation system and were evaluated by the ANOVA/Kruskal-Wallis tests followed by Tukey HSD/Dunn's tests ( $p < 0.05$ ). Data are  
 76 given as mean (n=4) ± SD.
